# Supplementary material for: Development of Autoimmune Diseases Among Children With Pediatric Acute-Onset Neuropsychiatric Syndrome
Source: PubMed Central journal article supplement (PMC11289697; doi:10.1001/jamanetworkopen.2024.21688), 2024-07-30
Supplement: jamanetwopen-e2421688-s002.pdf [file jamanetwopen-e2421688-s002.pdf]

## Data Sharing Statement

Ma. Development of Autoimmune Diseases Among Children With Pediatric Acute-Onset Neuropsychiatric Syndrome. *JAMA Netw Open*. Published July 30, 2024.  
doi:10.1001/jamanetworkopen.2024.21688

### Data

**Data available:** Yes

**Data types:** Deidentified participant data

**How to access data:** All de-identified participant data used in these analyses and related documents (study protocol, statistical analysis plan) will be shared on reasonable request from any qualified investigator via email to [meima@stanford.edu](mailto:meima@stanford.edu) or [jfranko@stanford.edu](mailto:jfranko@stanford.edu)

**When available:** With publication

### Supporting Documents

**Document types:** Statistical/analytic code

**How to access documents:** Will be shared on reasonable request from any qualified investigator via email to [meima@stanford.edu](mailto:meima@stanford.edu) or [jfranko@stanford.edu](mailto:jfranko@stanford.edu)

**When available:** With publication

### Additional Information

**Who can access the data:** on reasonable request from any qualified investigator

**Types of analyses:** for specified purpose

**Mechanisms of data availability:** after approval of a proposal or with a signed data access agreement
